# Supplementary material for: Sequencing of the core MHC region of black grouse (Tetrao tetrix) and comparative genomics of the galliform MHC
Source: PubMed Central journal article supplement (PMC3500228; doi:10.1186/1471-2164-13-553), 2012-10-15
Supplement: 1471-2164-13-553-S1.pdf [file 1471-2164-13-553-S1.pdf]

Additional file 1. Single nucleotide polymorphisms (SNPs) and deletion-insertion polymorphisms (DIPs) identified by comparison of the consensus sequence of black grouse MHC and the sequence of fosmid clone P2D1.

| Position | BGMHC/P2D1 |
|----------|------------|
| 14855    | G/A        |
| 14898    | G/A        |
| 14901    | A/G        |
| 14914    | A/G        |
| 14915    | C/T        |
| 14916    | A/G        |
| 14925    | A/T        |
| 14941    | G/A        |
| 14951    | C/T        |
| 14953    | T/C        |
| 15036    | T/C        |
| 15062    | A/T        |
| 15068    | A/G        |
| 15069    | G/A        |
| 15083    | G/A        |
| 15085    | G/C        |
| 15090    | C/G        |
| 15107    | C/T        |
| 15127    | T/G        |
| 15133    | C/T        |
| 15137    | T/C        |
| 15154    | C/G        |
| 15157    | A/T        |
| 15181    | C/T        |
| 15182    | A/G        |
| 15185    | G/A        |
| 15266    | G/A        |
| 15375    | C/A        |
| 15403    | A/G        |
| 15414    | G/A        |
| 15448    | T/C        |
| 15449    | G/A        |
| 15500    | T/A        |
| 15630    | G/A        |
| 15638    | T/A        |
| 15736    | T/C        |
| 15753    | G/T        |
| 15846    | G/A        |
| 15858    | A/G        |
| 15866    | G/A        |
| 15899    | G/A        |
| 15901    | C/T        |
| 16018    | C/A        |
| 16146    | T/C        |
| 16174    | G/A        |
| 16265    | A/G        |
| 16274    | C/T        |
| 16325    | T/C        |

16404 T/C  
16438 A/T  
16477 A/G  
16499 C/T  
16638 C/T  
16714 A/G  
16810 G/A  
16848 C/T  
16856 C/T  
16973 G/T  
17011 A/G  
17178 A/C  
17215 A/G  
17334 G/C  
17347 A/G  
17491 G/A  
17581 T/C  
17606 A/T  
17707 C/T  
17866 G/C  
17966 C/T  
18393 T/G  
18494 T/A  
18628 T/C  
18762 A/C  
18988 G/A  
19101 C/T  
19144 T/C  
19185 G/A  
19489 A/C  
19652 T/A  
19786 T/C  
20310 T/C  
21048 C/A  
21217 A/G  
21464 C/T  
21862 T/C  
22074 A/G  
22214 G/A  
22830 A/G  
22927 G/A  
22983 A/G  
23149 G/A  
23235 C/T  
23437 G/A  
23549 A/G  
24790 A/G  
24793 C/G  
24799 G/T  
24894 T/C  
25059 T/C  
25291 G/A  
25314 A/C  
25316 C/A

25343 A/G  
25472 A/G  
25507 C/T  
25553 C/A  
25558 T/C  
25645 T/C  
25741 A/G  
25986 T/C  
26089 G/A  
26193 C/A  
26195 G/A  
26196 A/C  
26198 T/C  
26218 A/T  
26223 G/A  
26231 A/C  
26239 A/G  
26241 G/A  
26251 T/C  
26252 A/G  
26253 T/C  
26297 G/C  
26338 A/G  
26339 T/C  
26360 T/C  
26363 C/A  
26364 C/A  
26367 C/G  
26372 C/G  
26374 T/A  
26383 C/T  
26413 A/G  
26417 T/C  
26418 C/A  
26419 G/T  
26420 C/G  
26425 C/A  
26527 T/C  
26528 G/C  
26529 T/C  
26531 G/C  
26533 C/T  
26537 C/A  
26555 T/C  
26599 T/C  
26616 T/G  
26709 C/A  
26758 T/G  
26772 C/T  
26774 C/T  
26790 G/C  
26795 G/A  
26877 T/C  
26881 T/C

26913 A/G  
26914 A/G  
26926 C/T  
26932 T/C  
26935 C/T  
26937 T/C  
26950 A/T  
26972 T/G  
26979 C/T  
26985 C/G  
26992 C/T  
26995 T/C  
27027 T/G  
27046 G/C  
27058 T/A  
27142 T/C  
27159 C/T  
27162 T/C  
27171 T/G  
27198 C/G  
27200 G/A  
27238 C/T  
27255 C/G  
27355 T/C  
27829 A/G  
28090 C/T  
28112 C/G  
28249 G/A  
28476 C/T  
28512 T/C  
28572 A/C  
28584 G/A  
28644 C/T  
28828 T/C  
28980 C/T  
29029 T/C  
29037 C/T  
29038 A/G  
29040 A/C  
29042 T/C  
29044 C/T  
29045 A/C  
29046 G/A  
29048 G/C  
29050 C/T  
29052 T/C  
29055 T/C  
29056 G/A  
29058 C/A  
29060 C/T  
29065 A/G  
29071 C/T  
29074 C/T  
29081 T/C

29084 G/A  
29095 C/T  
29098 T/C  
29100 C/T  
29101 T/C  
29116 C/T  
29118 T/C  
29119 C/T  
29157 A/G  
29249 G/A  
29509 A/T  
29666 A/G  
29742 T/A  
29821 C/T  
29839 A/G  
29840 T/G  
29841 G/C  
29844 A/G  
29845 T/A  
29846 G/T  
29855 T/A  
29918 C/T  
29939 G/C  
29963 A/G  
30158 C/T  
30192 A/G  
30194 A/G  
30214 G/A  
30549 A/T  
31017 A/G  
31936 C/A  
31964 T/C  
31974 T/C  
31995 A/G  
31997 A/G  
32560 T/A  
32689 C/T  
32792 A/G  
33037 T/C  
33771 C/T  
34543 G/A  
35159 G/A  
35488 G/A  
35882 G/A  
35906 T/C  
36065 A/G  
36318 G/A  
36395 G/A  
36412 C/T  
36842 G/A  
36866 C/T  
36899 A/G  
36911 T/C  
36959 C/G

37116 A/C  
37144 C/T  
37307 G/A  
37510 A/G  
38287 G/T  
38397 G/A  
39565 G/A  
40066 G/C  
40070 G/T  
40072 G/A  
40080 T/C  
42210 A/G  
43601 T/C  
44748 A/G

Position BGMHC/P2D1  
15676 GAG/---  
16123 CGACCTTTGCCCAACTT/-----  
16486 AT/--  
17216 A/-  
17607 A/-  
17766 ATC/---  
17867 CCTGG/-----  
22889 AAA/---  
23236 -----/GAGGAAGAGGA  
25562 CCCCCTCC/-----  
25770 -----/GCTCCCGCTCCC  
26944 -/T  
27124 AC/--  
27960 -/A  
28275 C/-  
28311 C/-  
28836 C/-  
29063 C/-  
29102 -/A  
29120 ACCTCCCCATGTCCCCACA/-----  
29813 TGA/---  
29861 --/AT  
33324 GTCCC/-----  
33613 GG/--  
34413 --/TT  
34563 --/AA  
35182 CCAGGGCCTCCCC/-----  
36161 CA/--  
39259 -/C  
39674 C/-  
40067 ACA/---  
42334 C/-  
42440 CCC/---
