# Supplementary material for: Sequencing of the core MHC region of black grouse (Tetrao tetrix) and comparative genomics of the galliform MHC
Source: PubMed Central journal article supplement (PMC3500228; doi:10.1186/1471-2164-13-553), 2012-10-15
Supplement: 1471-2164-13-553-S2.pdf [file 1471-2164-13-553-S2.pdf]

Additional file 2. Microsatellites identified from the black grouse MHC sequence.

| Motif  | Repeat | Start | End   |
|--------|--------|-------|-------|
| TTTTC  | 9      | 81    | 36    |
| GAATG  | 29     | 858   | 715   |
| TG     | 13     | 1178  | 1153  |
| CAG    | 11     | 19833 | 19799 |
| TCTG   | 11     | 24388 | 24344 |
| ATATG  | 19     | 29934 | 29837 |
| TCCCG  | 6      | 33330 | 33298 |
| CTGGGG | 8      | 34876 | 34834 |
| CAT    | 13     | 36025 | 35985 |
| TGG    | 12     | 36775 | 36738 |
| GGATG  | 23     | 60437 | 60313 |
| TTGGGG | 16     | 60554 | 60459 |
| GGCTG  | 29     | 72891 | 72756 |
| CCG    | 22     | 82735 | 82671 |
