# Supplementary material for: Sequencing of the core MHC region of black grouse (Tetrao tetrix) and comparative genomics of the galliform MHC
Source: PubMed Central journal article supplement (PMC3500228; doi:10.1186/1471-2164-13-553), 2012-10-15

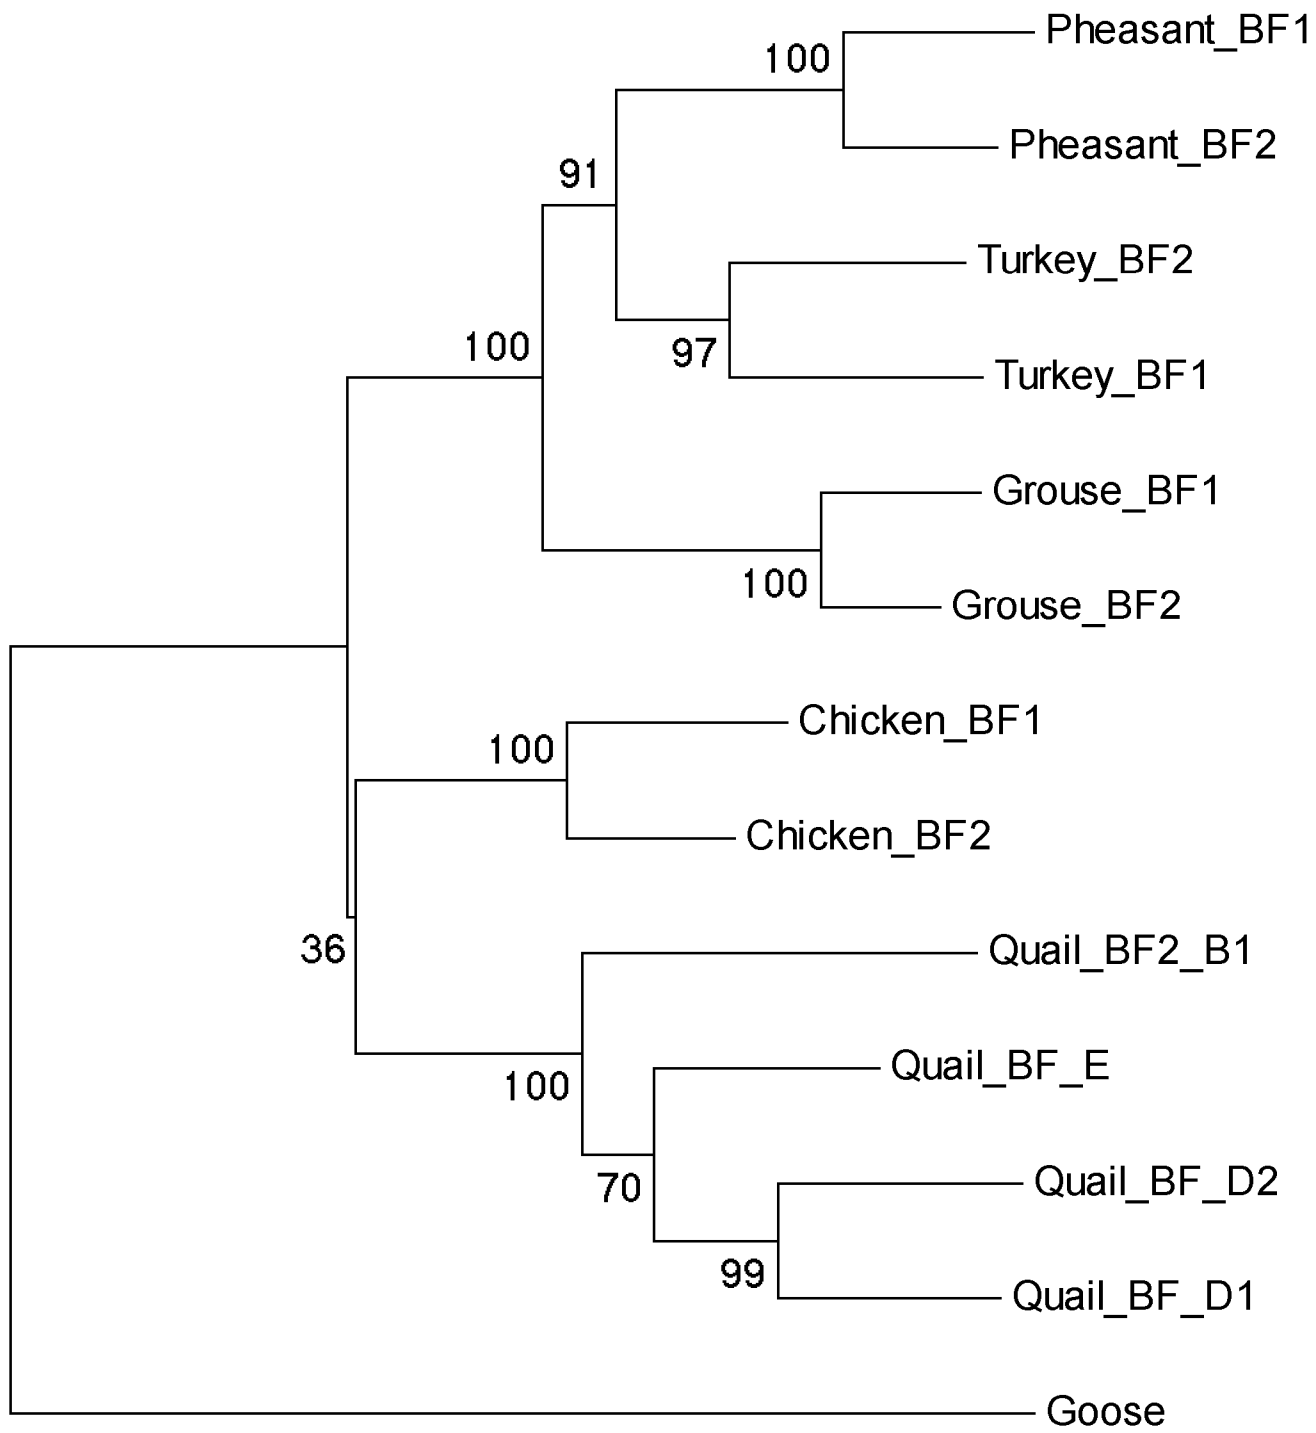

0.05

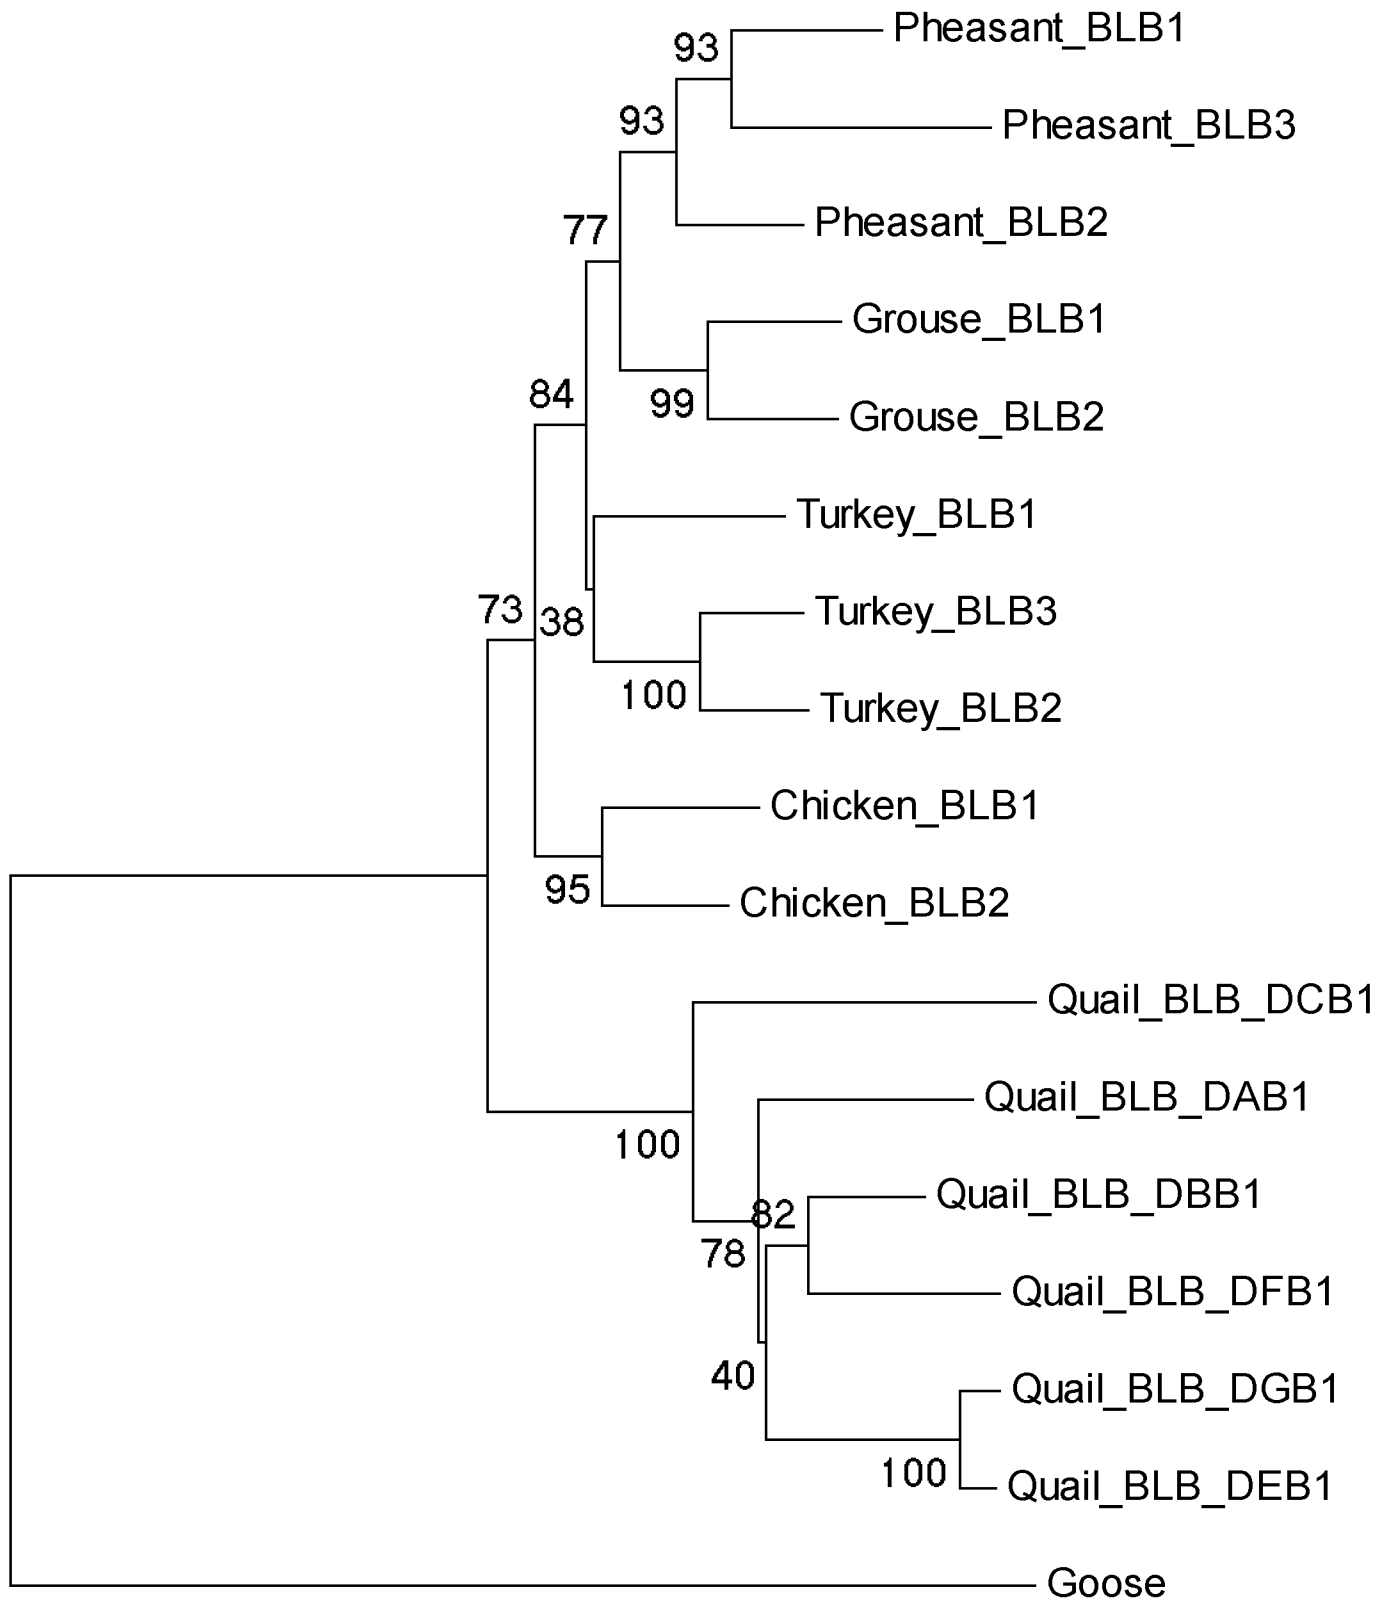

Supplement: 1471-2164-13-553-S3.pdf [file 1471-2164-13-553-S3.pdf]
