# Supplementary material for: Sequencing of the core MHC region of black grouse (Tetrao tetrix) and comparative genomics of the galliform MHC
Source: PubMed Central journal article supplement (PMC3500228; doi:10.1186/1471-2164-13-553), 2012-10-15
Supplement: 1471-2164-13-553-S4.pdf [file 1471-2164-13-553-S4.pdf]

Additional file 4. PCR primers used in screening the fosmid library for MHC-bearing clones.

| Locus | Sense Primer          | Anti-sense Primer      | Product Size (bp) |
|-------|-----------------------|------------------------|-------------------|
| BTN1  | TCACCCTGGACCCAAACA    | GGAAAGTGAGCCAACCCT     | 249               |
| BG    | ATAGCCATCACCATCTTGC   | CTCCGTGCCCTTCTCATT     | 335               |
| Blec2 | TTTCTGGCAGATCCATTCA   | GGACAACCTCCTTCAACA     | 203               |
| BLB   | GACAGCGAAGTGGGGAAATA  | CGCTCCTCTGCACCGTGA     | 163               |
| BRD   | GCTTACGCTTCCTCTTGC    | GAGTGGATCGTGCTCTGG     | 402               |
| DMA   | GCGGGTGACAATGCAGGAGT  | ACGCTGGTCTGTATGGTGGG   | 191               |
| BF    | CTCTGGTTGAAGCGTTCCTGC | TGCCCTGGTTCGTGTCTGTG   | 205               |
| TAP1  | AGGCCGACAGCAGCGGTGAA  | GGACAGCCGTGGTGGCATTG   | 259               |
| C4    | RGTCACCTGGGTCACCTCTG  | TCCCTCRGGCTRCRGGGAATGG | 280               |
